# Supplementary material for: Evaluation of NEWS2 response thresholds in a retrospective observational study from a UK acute hospital
Source: HighWire-hosted journal article supplement (doi:10.1136/bmjopen-2021-054027), 2022-02-01
Supplement: bmjopen-2021-054027supp001_data_supplement.pdf [file bmjopen-2021-054027supp001_data_supplement.pdf]

An Evaluation of NEWS2 response thresholds in a retrospective observational study  
from a UK acute hospital

Online supplement.

Dr Tanya Pankhurst, Dr Elizabeth Sapey, Ms Helen Gyves, Ms Felicity Evison, Ms Suzy  
Gallier, Professor Georgios Gkoutos, Professor Simon Ball

## Online Supplementary Figure 1 (Figure S1)

## Post admission days with no Index NEWS2 recorded

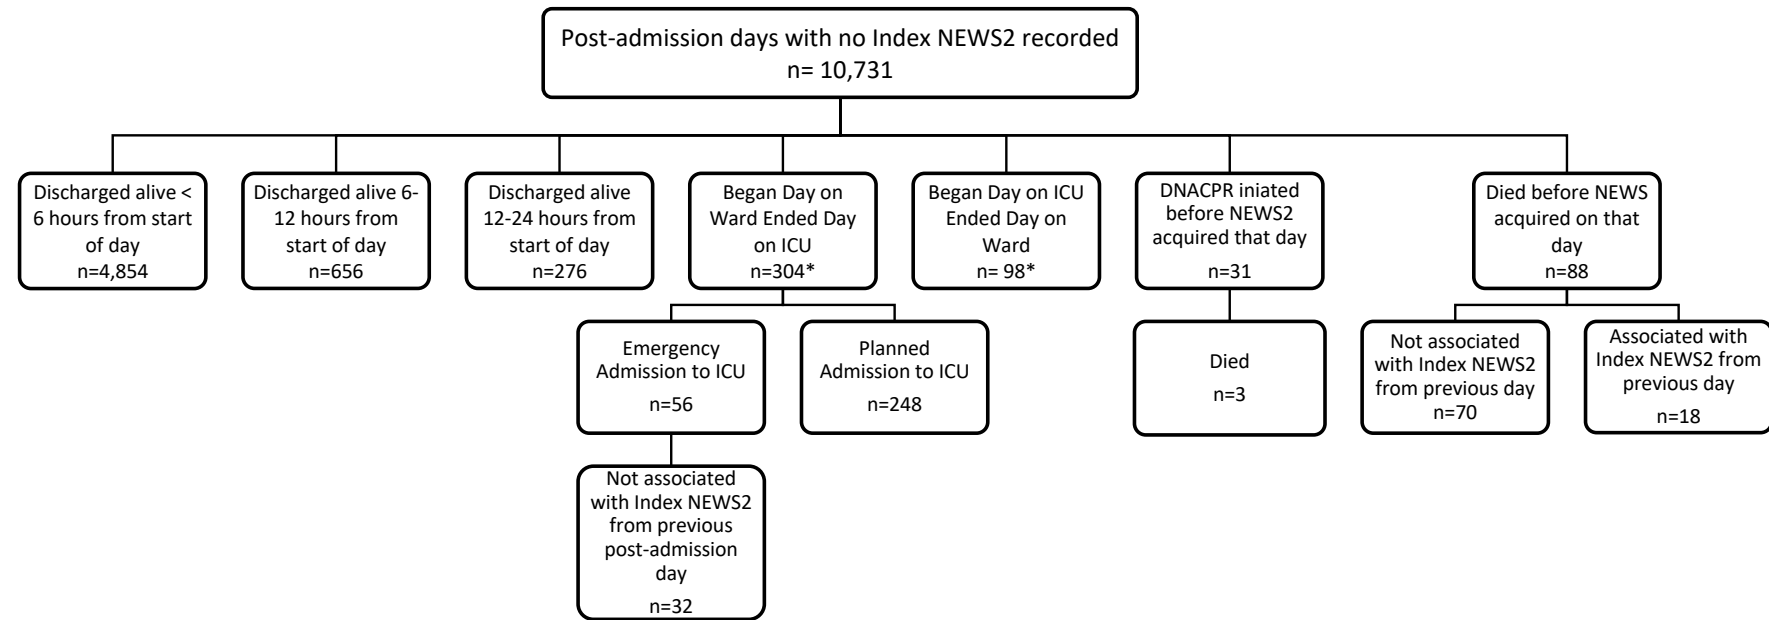

**Online Supplementary Figure 1 (Fig S1)****Post admission days with no Index NEWS2 recorded**

Of the 10,731 in which no Index-NEWS2 was recorded, 5,786 (53.9%) were discharged alive later that day. 433 (4.0%) were ineligible for part of the day because they were on ICU or had a DNACPR initiated. A further 88 (0.8%) died before a NEWS2 was recorded on that day. 4,424 post-admission days were therefore not associated with a NEWS2 record for unidentified reasons.

There were 144 events (88 deaths and 56 emergency admissions to ICU) associated with post-admission days in which no Index-NEWS2 was recorded and another 3 in which a DNACPR was initiated prior to NEWS2 acquisition and subsequent death. Of the 144 events, 102 were not associated with an Index NEWS2 from the previous day, 20 because they occurred on the first day. The other 82 were associated with NEWS2 acquired later in the previous day but occurred > 24 hours after that day's Index-NEWS2.

Online Supplementary Figure 2a (Fig S2a)

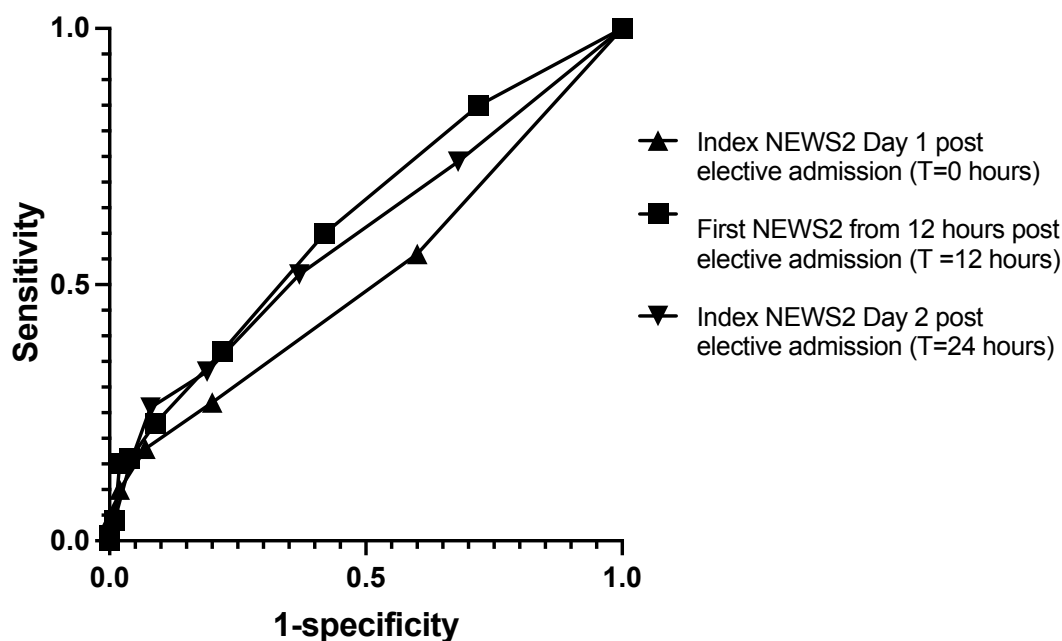**Legend Figure S2a**

Receiver operating characteristic (ROC) for the first NEWS2 obtained from 0-, 12- and 24-hours post elective-admission. The respective c-statistics were 0.51, 0.63 and 0.60. The c-statistic = 0.74 for all later post elective admission patient-days combined. The outcome event was the first of unplanned admission to ICU (type 1 and 2 of the NHS critical care minimum dataset) or death of the patient within 24 hours of an evaluated NEWS2 score. As anticipated in the study design, Index NEWS2 on Day 1 of elective admission was not predictive of an adverse outcome. Its acquisition almost always preceded physiological insult, specifically a planned procedure occurring in 94.7% of patients in the subsequent 12 hours. Assessment of the discriminatory power of NEWS2 in the hours immediately following a procedure is beyond the scope of this analysis but appears low.

The NEWS2 associated event rate on Day 1 post elective-admission = 0.37/100 patient-days and Day 2 = 0.34/100 patient-days.

## Online Supplementary Figure 2b (Fig S2b)

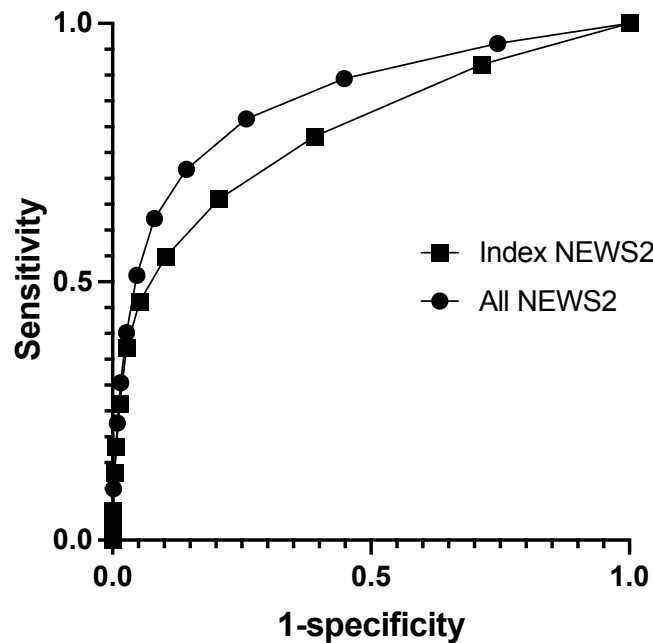

## Legend Figure S2b

Receiver operating characteristic (ROC) for Index NEWS2 recorded in Day 1 to 56 excluding first post elective admission day (c statistic = 0.78, 95% CI:0.76-0.81) and All NEWS2 recorded in Days 1 to 56 excluding first post elective admission day (c statistic = 0.85, 95% CI: 0.85-0.86)  $p < 0.001$ . A bootstrap analysis was performed with 10,000 repetitions of 10,000 patient-days, the median and 2.5th and 97.5th percentiles were then used to generate the ROC curve and corresponding confidence intervals. The outcome event was defined as the first of unplanned admission to ICU (type 1 and 2 of the NHS critical care minimum dataset) or death of the patient within 24 hours of a NEWS2 score.

## Online Supplementary Figure 3a (Fig S3a)

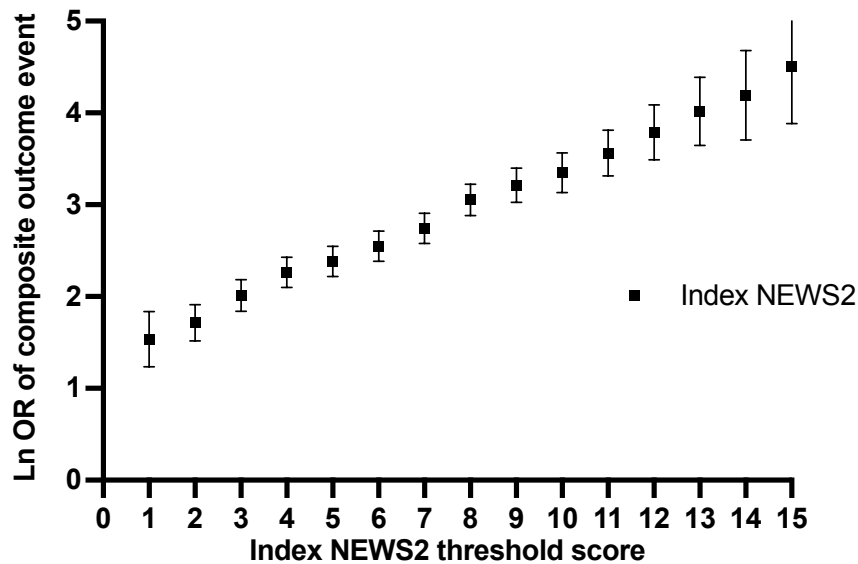

## Legend Figure S3a

The Ln of the Odds Ratio (Ln OR)  $\pm$  95% confidence intervals for occurrence of the composite outcome event when the Index NEWS2  $\geq$  threshold score vs.  $<$  threshold score. The composite outcome event was the first of unplanned admission to ICU (type 1 and 2 of the NHS critical care minimum dataset) or death of the patient within 24 hours of a NEWS2 score. This analysis included NEWS2 scores from Day 1 to 56 post-admission other than for Day 1 of elective admission (Table S2a and S2b).

Although NEWS2 is not constituted to report absolute risk, it exhibits features useful in representing risk. Integer changes in threshold were associated with an approximately equal change in the odds ratio of an outcome event. Across the range of scores, the OR of an event  $\geq$  threshold score vs.  $<$  threshold score, increased by a factor of 1.2. (Ln OR of composite outcome event =  $1.35 + 0.205$  (Index NEWS2 threshold score);  $R^2 = 0.99$ . For increase in NEWS2 = 1, the increase in Ln OR of composite outcome event = 0.205, the OR of composite outcome event increases by a factor of  $e^{0.205} = 1.2$ ).

(These relationships resemble Fig 2b, because the relationship between sensitivity and Index NEWS2 is approximately negative linear and because at low event rates the odds of an event at threshold  $\approx$  PPV =  $1/NNE$ ; the Ln (odds of an event)  $\approx$   $-\text{Ln}(NNE)$ ).

## Online Supplementary Figure 3b (Fig S3b)

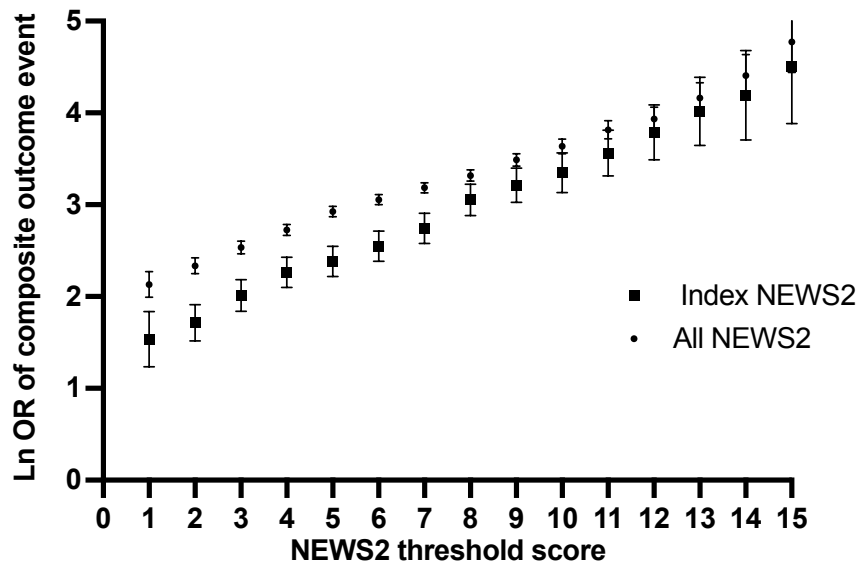

## Legend Figure S3b

The Ln of the Odds Ratio (Ln OR)  $\pm$  95% confidence intervals for occurrence of the composite outcome event when the Index NEWS2 or All NEWS2  $\geq$  threshold score vs.  $<$  threshold score. This representation of the data reflects the differences in performance between Index-and All-NEWS2 shown in Fig S2b.

## Supplementary Table S1 NEWS2 and SEWS scoring

### National Early Warning Score (NEWS) 2 Standardising the assessment of acute-illness severity in the NHS– Royal College Physicians, London

Chart1: The NEWS2 scoring system

| Physiological parameter        | Score |        |           |                  |                 |                 |               |
|--------------------------------|-------|--------|-----------|------------------|-----------------|-----------------|---------------|
|                                | 3     | 2      | 1         | 0                | 1               | 2               | 3             |
| Respiration rate (per minute)  | ≤8    |        | 9–11      | 12–20            |                 | 21–24           | ≥25           |
| SpO <sub>2</sub> Scale 1 (%)   | ≤91   | 92–93  | 94–95     | ≥96              |                 |                 |               |
| SpO <sub>2</sub> Scale 2 (%)   | ≤83   | 84–85  | 86–87     | 88–92 ≥93 on air | 93–94 on oxygen | 95–96 on oxygen | ≥97 on oxygen |
| Air or oxygen?                 |       | Oxygen |           | Air              |                 |                 |               |
| Systolic blood pressure (mmHg) | ≤90   | 91–100 | 101–110   | 111–219          |                 |                 | ≥220          |
| Pulse (per minute)             | ≤40   |        | 41–50     | 51–90            | 91–110          | 111–130         | ≥131          |
| Consciousness                  |       |        |           | Alert            |                 |                 | CVPU          |
| Temperature (°C)               | ≤35.0 |        | 35.1–36.0 | 36.1–38.0        | 38.1–39.0       | ≥39.1           |               |

Chart 2: NEWS2 thresholds and triggers

| NEW score                                           | Clinical risk | Response                           |
|-----------------------------------------------------|---------------|------------------------------------|
| Aggregate score 0–4                                 | Low           | Ward-based response                |
| Red score<br>Score of 3 in any individual parameter | Low–medium    | Urgent ward-based response*        |
| Aggregate score 5–6                                 | Medium        | Key threshold for urgent response* |
| Aggregate score 7 or more                           | High          | Urgent or emergency response**     |

\* Response by a clinician or team with competence in the assessment and treatment of acutely ill patients and in recognising when the escalation of care to a critical care team is appropriate.

\*\*The response team must also include staff with critical care skills, including airway management.

National Early Warning Score (NEWS) 2 Standardising the assessment of acute-illness severity in the NHS– Royal College Physicians, London,

© Royal College of Physicians 2017

### Standardised early warning scoring system (SEWS) parameters and scoring system.

| Physiological parameter       | Score |           |           |           |           |         |      |
|-------------------------------|-------|-----------|-----------|-----------|-----------|---------|------|
|                               | 3     | 2         | 1         | 0         | 1         | 2       | 3    |
| Respiration rate (per minute) | ≤8    |           |           | 9–20      | 21–30     | 31–35   | ≥36  |
| SaO <sub>2</sub>              | <85   | 85–89     | 90–92     | ≥93       |           |         |      |
| Temperature (°C)              | ≤33.9 | 34.0–34.9 | 35.0–35.9 | 36.0–37.9 | 38.0–38.9 | ≥39.0   |      |
| Blood pressure (mmHg)         | ≤69   | 70–79     | 80–99     | 100–199   |           | ≥200    |      |
| Pulse (per minute)            | ≤29   | 30–39     | 40–49     | 50–99     | 100–109   | 110–129 | ≥130 |
| AVPU                          |       |           |           | Alert     | Verbal    | Pain    | None |



**Supplementary Table S2 – Index NEWS2 and SEWS (a) and linked outcomes events (b) from Day 1 to 56 post-admission excluding Day 1 of elective admission**

**Table S2a Index NEWS2 and SEWS**

|           | NEWS2 |        |        |        |        |          |          |        |        |        |        |        |        |        |        |        |        |        |        |        |            |
|-----------|-------|--------|--------|--------|--------|----------|----------|--------|--------|--------|--------|--------|--------|--------|--------|--------|--------|--------|--------|--------|------------|
|           | 0     | 1      | 2      | 3      | 4      | 3 single | 4 single | 5      | 6      | 7      | 8      | 9      | 10     | 11     | 12     | 13     | 14     | 15     | 16     | 17     | Total SEWS |
| 0         | 72852 | 54298  | 21005  | 6960   | 2310   | 123      | 110      | 891    | 232    | 40     | 5      | 1      | 1      | 0      | 0      | 0      | 0      | 0      | 0      | 0      | 158828     |
| 1         | 674   | 28195  | 22333  | 10054  | 3685   | 2628     | 1565     | 2212   | 867    | 292    | 57     | 19     | 3      | 1      | 1      | 0      | 0      | 0      | 0      | 0      | 72586      |
| 2         | 283   | 835    | 3995   | 4771   | 2162   | 1029     | 1512     | 1910   | 952    | 427    | 174    | 60     | 16     | 3      | 1      | 0      | 0      | 0      | 0      | 0      | 18130      |
| 3         | 2     | 170    | 291    | 800    | 925    | 445      | 478      | 1068   | 793    | 481    | 246    | 102    | 35     | 17     | 4      | 0      | 0      | 0      | 0      | 0      | 5857       |
| 4         | 0     | 5      | 27     | 43     | 156    | 9        | 123      | 394    | 431    | 301    | 211    | 143    | 68     | 15     | 7      | 2      | 2      | 0      | 0      | 0      | 1937       |
| 5         | 0     | 0      | 0      | 4      | 10     | 3        | 14       | 62     | 129    | 143    | 157    | 118    | 85     | 39     | 16     | 4      | 6      | 0      | 1      | 0      | 791        |
| 6         | 0     | 0      | 0      | 0      | 0      | 0        | 0        | 5      | 21     | 40     | 66     | 66     | 59     | 46     | 23     | 10     | 2      | 0      | 0      | 0      | 338        |
| 7         | 0     | 0      | 0      | 0      | 0      | 0        | 0        | 0      | 1      | 5      | 15     | 27     | 24     | 26     | 12     | 8      | 2      | 2      | 1      | 0      | 123        |
| 8         | 0     | 0      | 0      | 0      | 0      | 0        | 0        | 0      | 2      | 0      | 6      | 7      | 7      | 10     | 10     | 5      | 4      | 3      | 1      | 1      | 56         |
| 9         | 0     | 0      | 0      | 0      | 0      | 0        | 0        | 0      | 0      | 0      | 0      | 2      | 2      | 2      | 4      | 4      | 2      | 2      | 0      | 0      | 18         |
| 10        | 0     | 0      | 0      | 0      | 0      | 0        | 0        | 0      | 0      | 0      | 0      | 0      | 0      | 2      | 1      | 2      | 1      | 0      | 1      | 2      | 9          |
| 11        | 0     | 0      | 0      | 0      | 0      | 0        | 0        | 0      | 0      | 0      | 0      | 0      | 0      | 1      | 0      | 1      | 0      | 0      | 1      | 0      | 3          |
| 12        | 0     | 0      | 0      | 0      | 0      | 0        | 0        | 0      | 0      | 0      | 0      | 0      | 0      | 0      | 0      | 0      | 0      | 1      | 0      | 0      | 1          |
| 13        | 0     | 0      | 0      | 0      | 0      | 0        | 0        | 0      | 0      | 0      | 0      | 0      | 0      | 0      | 0      | 0      | 0      | 0      | 0      | 1      | 1          |
| Total     | 73811 | 83503  | 47651  | 22632  | 9248   | 4237     | 3802     | 6542   | 3428   | 1729   | 937    | 545    | 300    | 162    | 79     | 36     | 19     | 8      | 5      | 4      |            |
| Cum Total | 73765 | 157187 | 204768 | 231572 | 244572 |          |          | 251062 | 254427 | 256108 | 257015 | 257536 | 257818 | 257966 | 258038 | 258068 | 258083 | 258090 | 258094 | 258098 |            |

Of the 8039 that NEWS2 = 3 in any single parameter 149 (1.8%) triggered the lowest SEWS threshold  $\geq 4$

Of the 6542 that NEWS2 = 5, 461 triggered (7.0%) the lowest SEWS threshold  $\geq 4$

Of the 3428 that NEWS2 = 6, 584 triggered (16.0%) the lowest SEWS threshold  $\geq 4$

Cum Total Is the cumulative total at or below the NEWS2 score *without an event* used to calculate the odds ratio of the composite outcome event when the Index NEWS2  $\geq$  threshold score vs. < threshold score (Fig S3a).

**Table S2b outcome events linked to Index NEWS2 and SEWS**

|           | NEWS2 |     |     |     |     |          |          |     |     |     |     |     |     |     |     |     |     |     |     |     | Total SEWS |
|-----------|-------|-----|-----|-----|-----|----------|----------|-----|-----|-----|-----|-----|-----|-----|-----|-----|-----|-----|-----|-----|------------|
|           | 0     | 1   | 2   | 3   | 4   | 3 single | 4 single | 5   | 6   | 7   | 8   | 9   | 10  | 11  | 12  | 13  | 14  | 15  | 16  | 17  |            |
| 0         | 45    | 52  | 28  | 21  | 9   | 0        | 0        | 3   | 2   | 1   | 0   | 0   | 0   | 0   | 0   | 0   | 0   | 0   | 0   | 0   | 161        |
| 1         | 0     | 25  | 30  | 19  | 19  | 5        | 3        | 12  | 18  | 5   | 0   | 1   | 0   | 0   | 0   | 0   | 0   | 0   | 0   | 0   | 137        |
| 2         | 1     | 3   | 11  | 11  | 7   | 2        | 5        | 20  | 16  | 6   | 5   | 3   | 1   | 0   | 1   | 0   | 0   | 0   | 0   | 0   | 92         |
| 3         | 0     | 1   | 1   | 4   | 5   | 3        | 1        | 14  | 16  | 20  | 8   | 7   | 0   | 0   | 1   | 0   | 0   | 0   | 0   | 0   | 81         |
| 4         | 0     | 0   | 0   | 0   | 0   | 0        | 1        | 3   | 8   | 7   | 5   | 4   | 1   | 1   | 0   | 0   | 0   | 0   | 0   | 0   | 30         |
| 5         | 0     | 0   | 0   | 0   | 0   | 0        | 0        | 0   | 2   | 8   | 9   | 6   | 8   | 4   | 3   | 0   | 2   | 0   | 0   | 0   | 42         |
| 6         | 0     | 0   | 0   | 0   | 0   | 0        | 0        | 0   | 1   | 1   | 3   | 1   | 6   | 4   | 2   | 1   | 0   | 0   | 0   | 0   | 19         |
| 7         | 0     | 0   | 0   | 0   | 0   | 0        | 0        | 0   | 0   | 0   | 0   | 0   | 2   | 5   | 0   | 2   | 0   | 0   | 0   | 0   | 9          |
| 8         | 0     | 0   | 0   | 0   | 0   | 0        | 0        | 0   | 0   | 0   | 0   | 2   | 0   | 0   | 0   | 1   | 2   | 1   | 1   | 0   | 7          |
| 9         | 0     | 0   | 0   | 0   | 0   | 0        | 0        | 0   | 0   | 0   | 0   | 0   | 0   | 0   | 0   | 1   | 0   | 0   | 0   | 0   | 1          |
| 10        | 0     | 0   | 0   | 0   | 0   | 0        | 0        | 0   | 0   | 0   | 0   | 0   | 0   | 0   | 0   | 1   | 0   | 0   | 0   | 0   | 1          |
| 11        | 0     | 0   | 0   | 0   | 0   | 0        | 0        | 0   | 0   | 0   | 0   | 0   | 0   | 0   | 0   | 0   | 0   | 0   | 0   | 0   | 0          |
| 12        | 0     | 0   | 0   | 0   | 0   | 0        | 0        | 0   | 0   | 0   | 0   | 0   | 0   | 0   | 0   | 0   | 0   | 0   | 0   | 0   | 0          |
| 13        | 0     | 0   | 0   | 0   | 0   | 0        | 0        | 0   | 0   | 0   | 0   | 0   | 0   | 0   | 0   | 0   | 0   | 0   | 0   | 0   | 0          |
| Total     | 46    | 81  | 70  | 55  | 40  | 10       | 10       | 52  | 63  | 48  | 30  | 24  | 18  | 14  | 7   | 6   | 4   | 1   | 1   | 0   |            |
| Cum Total | 46    | 127 | 197 | 262 | 312 |          |          | 364 | 427 | 475 | 505 | 529 | 547 | 561 | 568 | 574 | 578 | 579 | 580 | 580 |            |

Of the 20 that NEWS2 = 3 in any single parameter, 1 (5.0%) triggered the lowest SEWS threshold  $\geq 4$

Of the 52 that NEWS2 = 5, 3 (5.8%) the lowest SEWS threshold  $\geq 4$

Of the 63 that NEWS2 = 6, 11 triggered (17.5%) the lowest SEWS threshold  $\geq 4$

Cum Total is the cumulative total at or below the NEWS2 score *with an event* used to calculate the odds ratio of the composite outcome event when the Index NEWS2  $\geq$  threshold score vs.  $<$  threshold score (Fig S3a).

### Supplementary Table S3 – All NEWS2 and SEWS (a) and linked outcomes events (b) from Day 1 to 56 post-admission excluding Day 1 of elective admission

**Table S3a All NEWS2 and SEWS**

|           | NEWS2  |        |        |        |         |          |          |         |         |         |         |         |         |         |         |         |         |         |         |         |         |           | Total SEWS |
|-----------|--------|--------|--------|--------|---------|----------|----------|---------|---------|---------|---------|---------|---------|---------|---------|---------|---------|---------|---------|---------|---------|-----------|------------|
|           | 0      | 1      | 2      | 3      | 4       | 3 single | 4 single | 5       | 6       | 7       | 8       | 9       | 10      | 11      | 12      | 13      | 14      | 15      | 16      | 17      | 18      |           |            |
| 0         | 291135 | 225784 | 99131  | 37585  | 12886   | 631      | 500      | 4720    | 1444    | 269     | 46      | 11      | 1       | 0       | 0       | 0       | 0       | 0       | 0       | 0       | 0       | 674143    |            |
| 1         | 2748   | 114393 | 99833  | 49029  | 20759   | 12435    | 7958     | 13629   | 6182    | 2206    | 696     | 143     | 34      | 5       | 1       | 0       | 0       | 0       | 0       | 0       | 0       | 330051    |            |
| 2         | 1159   | 3772   | 18598  | 24228  | 12226   | 4894     | 7661     | 11932   | 7365    | 3669    | 1681    | 666     | 175     | 37      | 11      | 1       | 0       | 0       | 0       | 0       | 0       | 98075     |            |
| 3         | 10     | 583    | 1364   | 3940   | 5404    | 2053     | 2820     | 6782    | 5438    | 3983    | 2413    | 1231    | 462     | 188     | 54      | 12      | 2       | 0       | 0       | 0       | 0       | 36739     |            |
| 4         | 0      | 15     | 113    | 279    | 778     | 55       | 653      | 2462    | 2560    | 2349    | 1883    | 1428    | 768     | 302     | 122     | 33      | 9       | 3       | 0       | 0       | 0       | 13812     |            |
| 5         | 0      | 0      | 2      | 19     | 53      | 11       | 44       | 369     | 809     | 1021    | 1044    | 1024    | 763     | 442     | 184     | 76      | 28      | 9       | 1       | 0       | 0       | 5899      |            |
| 6         | 0      | 0      | 0      | 0      | 2       | 0        | 3        | 15      | 105     | 227     | 365     | 503     | 485     | 368     | 213     | 112     | 48      | 12      | 3       | 0       | 0       | 2461      |            |
| 7         | 0      | 0      | 0      | 0      | 0       | 0        | 0        | 1       | 13      | 27      | 83      | 166     | 158     | 197     | 151     | 89      | 59      | 17      | 8       | 0       | 2       | 971       |            |
| 8         | 0      | 0      | 0      | 0      | 0       | 0        | 0        | 0       | 3       | 4       | 19      | 30      | 62      | 98      | 64      | 64      | 40      | 22      | 9       | 2       | 1       | 418       |            |
| 9         | 0      | 0      | 0      | 0      | 0       | 0        | 0        | 0       | 0       | 0       | 3       | 5       | 13      | 19      | 40      | 35      | 22      | 20      | 11      | 3       | 0       | 171       |            |
| 10        | 0      | 0      | 0      | 0      | 0       | 0        | 0        | 0       | 0       | 0       | 0       | 2       | 2       | 4       | 11      | 10      | 12      | 6       | 9       | 4       | 1       | 61        |            |
| 11        | 0      | 0      | 0      | 0      | 0       | 0        | 0        | 0       | 0       | 0       | 0       | 0       | 0       | 1       | 1       | 3       | 2       | 2       | 4       | 0       | 0       | 13        |            |
| 12        | 0      | 0      | 0      | 0      | 0       | 0        | 0        | 0       | 0       | 0       | 0       | 0       | 0       | 0       | 0       | 1       | 3       | 2       | 1       | 1       | 0       | 8         |            |
| 13        | 0      | 0      | 0      | 0      | 0       | 0        | 0        | 0       | 0       | 0       | 0       | 0       | 0       | 0       | 0       | 0       | 0       | 1       | 0       | 1       | 0       | 2         |            |
| Total     | 295052 | 344547 | 219041 | 115080 | 52108   | 20079    | 19639    | 39910   | 23919   | 13755   | 8233    | 5209    | 2923    | 1661    | 852     | 436     | 225     | 94      | 46      | 11      | 4       | 1,162,824 |            |
| Cum Total | 294846 | 639036 | 857663 | 992306 | 1063551 |          |          | 1102881 | 1126214 | 1139456 | 1147276 | 1152092 | 1154736 | 1156173 | 1156904 | 1157262 | 1157439 | 1157501 | 1157530 | 1157539 | 1157540 |           |            |

Of the 39178 that NEWS2 = 3 in any single parameter, (1.9%) 766 triggered the lowest SEWS threshold  $\geq 4$

Of the 39910 that NEWS2 = 5, 2847 triggered (7.1%) the lowest SEWS threshold  $\geq 4$

Of the 23919 that NEWS2 = 6, 3490 triggered (14.5%) the lowest SEWS threshold  $\geq 4$

Cum Total Is the cumulative total at or below the NEWS2 score *without an event* used to calculate the odds ratio of the composite outcome event when the Index NEWS2  $\geq$  threshold score vs.  $<$  threshold score (Fig S3b).

**Table S3b outcome events linked to All NEWS2 and SEWS**

|           | NEWS2 |     |     |      |      |          |          |      |      |      |      |      |      |      |      |      |      |      |      |      |      |      | Total SEWS |
|-----------|-------|-----|-----|------|------|----------|----------|------|------|------|------|------|------|------|------|------|------|------|------|------|------|------|------------|
|           | 0     | 1   | 2   | 3    | 4    | 3 single | 4 single | 5    | 6    | 7    | 8    | 9    | 10   | 11   | 12   | 13   | 14   | 15   | 16   | 17   | 18   |      |            |
| 0         | 200   | 208 | 194 | 150  | 73   | 0        | 1        | 37   | 16   | 5    | 0    | 0    | 0    | 0    | 0    | 0    | 0    | 0    | 0    | 0    | 0    | 884  |            |
| 1         | 3     | 140 | 162 | 163  | 152  | 39       | 29       | 168  | 108  | 56   | 16   | 4    | 0    | 0    | 0    | 0    | 0    | 0    | 0    | 0    | 0    | 1040 |            |
| 2         | 3     | 7   | 55  | 94   | 81   | 30       | 63       | 194  | 188  | 117  | 71   | 37   | 14   | 1    | 2    | 0    | 0    | 0    | 0    | 0    | 0    | 957  |            |
| 3         | 0     | 2   | 3   | 23   | 55   | 15       | 31       | 135  | 159  | 189  | 130  | 80   | 32   | 16   | 7    | 1    | 0    | 0    | 0    | 0    | 0    | 878  |            |
| 4         | 0     | 0   | 0   | 2    | 5    | 0        | 12       | 40   | 89   | 96   | 108  | 118  | 62   | 47   | 14   | 1    | 1    | 0    | 0    | 0    | 0    | 595  |            |
| 5         | 0     | 0   | 0   | 0    | 0    | 0        | 0        | 6    | 24   | 40   | 60   | 81   | 88   | 63   | 23   | 13   | 7    | 2    | 0    | 0    | 0    | 407  |            |
| 6         | 0     | 0   | 0   | 0    | 0    | 0        | 0        | 0    | 2    | 7    | 24   | 50   | 54   | 54   | 23   | 14   | 5    | 3    | 0    | 0    | 0    | 236  |            |
| 7         | 0     | 0   | 0   | 0    | 0    | 0        | 0        | 0    | 0    | 1    | 3    | 17   | 24   | 31   | 30   | 17   | 11   | 6    | 1    | 0    | 2    | 143  |            |
| 8         | 0     | 0   | 0   | 0    | 0    | 0        | 0        | 0    | 0    | 2    | 1    | 5    | 3    | 11   | 14   | 19   | 14   | 11   | 4    | 1    | 0    | 85   |            |
| 9         | 0     | 0   | 0   | 0    | 0    | 0        | 0        | 0    | 0    | 0    | 0    | 0    | 2    | 1    | 4    | 10   | 5    | 6    | 6    | 0    | 0    | 34   |            |
| 10        | 0     | 0   | 0   | 0    | 0    | 0        | 0        | 0    | 0    | 0    | 0    | 1    | 0    | 0    | 4    | 2    | 3    | 4    | 3    | 1    | 1    | 19   |            |
| 11        | 0     | 0   | 0   | 0    | 0    | 0        | 0        | 0    | 0    | 0    | 0    | 0    | 0    | 0    | 0    | 0    | 1    | 0    | 3    | 0    | 0    | 4    |            |
| 12        | 0     | 0   | 0   | 0    | 0    | 0        | 0        | 0    | 0    | 0    | 0    | 0    | 0    | 0    | 0    | 1    | 1    | 0    | 0    | 0    | 0    | 2    |            |
| 13        | 0     | 0   | 0   | 0    | 0    | 0        | 0        | 0    | 0    | 0    | 0    | 0    | 0    | 0    | 0    | 0    | 0    | 0    | 0    | 0    | 0    | 0    |            |
| Total     | 206   | 357 | 414 | 432  | 366  | 84       | 136      | 580  | 586  | 513  | 413  | 393  | 279  | 224  | 121  | 78   | 48   | 32   | 17   | 2    | 3    | 5284 |            |
| Cum Total | 206   | 563 | 977 | 1493 | 1995 |          |          | 2575 | 3161 | 3674 | 4087 | 4480 | 4759 | 4983 | 5104 | 5182 | 5230 | 5262 | 5279 | 5281 | 5284 |      |            |

Of the 220 that NEWS2 = 3 in any single parameter 12 (5.4%) triggered the lowest SEWS threshold  $\geq 4$

Of the 580 that NEWS2 = 5, 46 triggered (7.9%) the lowest SEWS threshold  $\geq 4$

Of the 586 that NEWS2 = 6, 115 triggered (19.6%) the lowest SEWS threshold  $\geq 4$

5284 outcome events are recorded because every NEWS2 is treated independently and linked to an outcome event over the subsequent 24 hours.

Cum Total is the cumulative total at or below the NEWS2 score *with an event* used to calculate the odds ratio of the composite outcome event when the Index NEWS2  $\geq$  threshold score vs.  $<$  threshold score (Fig S3b).

**Supplementary Table S4 bed occupancy by the in-patient population at midday**

| <b>Group</b>                                        | <b>Number of Beds occupied at 12.00<sup>a</sup></b> |
|-----------------------------------------------------|-----------------------------------------------------|
| <b>Patients eligible for NEWS2 analysis</b>         |                                                     |
| emergency admission in hospital < 24 hours at 12.00 | 98 ± 15                                             |
| emergency admission in hospital ≥24 hours at 12.00  | 632 ± 31                                            |
| elective admission in hospital <24 hours at 12.00   | 150 (IQR: 53-162)                                   |
| elective admission in hospital ≥24 hours at 12.00   | 198 ± 21                                            |
| <b>Patients not eligible for NEWS2 analysis</b>     |                                                     |
| ICU                                                 | 72 (IQR: 67-76)                                     |
| DNACPR                                              | 170 ± 15                                            |

**Supplementary Table 4 legend**

Number of beds occupied at midday for the 273 days between 01/11/2018 and 31/7/2019.

<sup>a</sup> Mean ± standard deviation for normally distributed groups. Median and interquartile range if not normally distributed. (Elective admission in hospital <24 hours included day case admissions which vary significantly with the day of the week). In those eligible for NEWS2 analysis, weekday bed occupancy = 1096 (median; IQR: 1079-1113) and weekend bed occupancy = 949 (median; IQR: 937-976). Across all days, the mean daily bed occupancy at midday in those eligible for NEWS2 analysis = 1046.
